# Supplementary material for: The transcription factor Zfp503 promotes the D1 MSN identity and represses the D2 MSN identity
Source: PubMed Central journal article supplement (PMC9445169; doi:10.3389/fcell.2022.948331), 2022-08-23
Supplement: Image1.pdf [file Image1.pdf]

## Supplementary

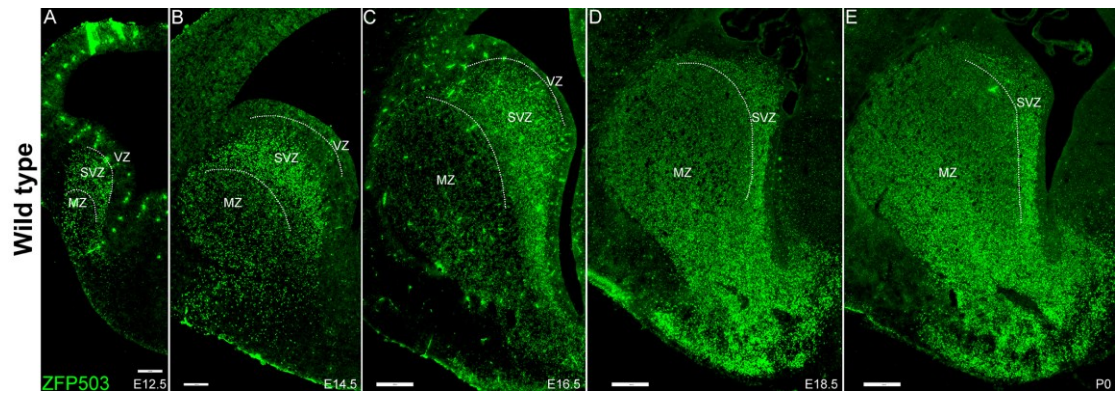

**FIGURE S1.** Ontogeny of Zfp503 protein expression in developing striatum.

**(A-E)** ZFP503 protein is selectively detected in the LGE (striatal primordia) at E12.5

(A), E14.5 (B), E16.5 (C), E18.5 (D) and P0 (E). Scale bar: 200 μm in A-E.

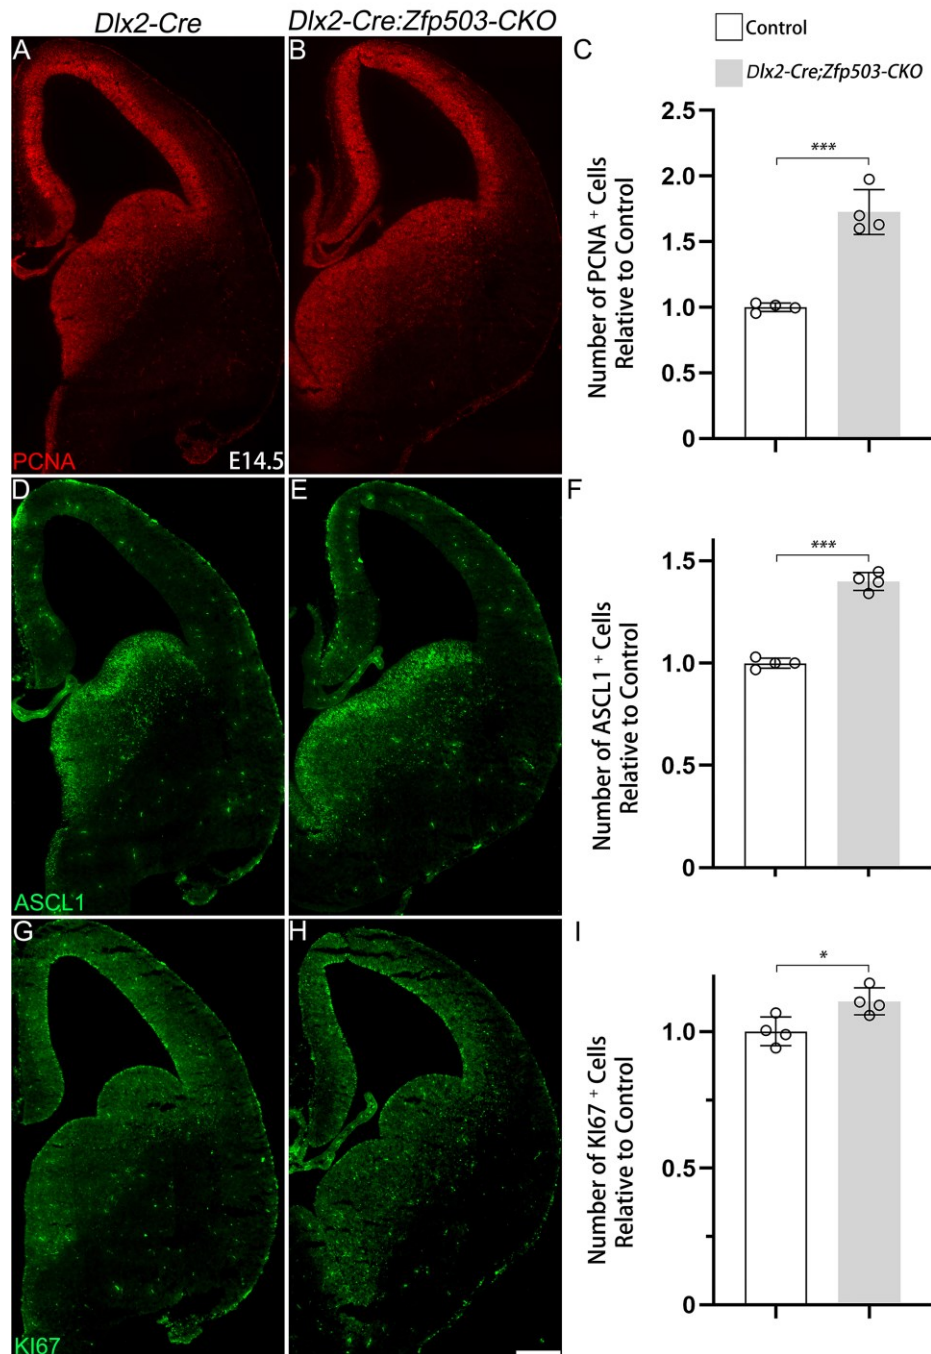

**FIGURE S2.** The differentiation of the progenitor cells was affected in the *Zfp503-DCKO* mice. (A-I) The number of the PCNA-, ASCL1- and KI67-positive cells was significantly reduced in the *Zfp503-DCKO* mice compared to the control mice. (unpaired two-tailed Student's t-test, \* $P < 0.05$ , \*\*\* $P < 0.001$ ,  $n = 4$  mice per group, mean  $\pm$  SEM). Scale bar: 500  $\mu\text{m}$  in H for A-H.
